# Supplementary material for: Metal-free carbon nanotube–SiC nanowire heterostructures with enhanced photocatalytic H2 evolution under visible light irradiation
Source: Royal Society of Chemistry journal article supplement (doi:10.1039/c4cy01757a), 2015-01-01
Supplement: c4cy01757a1.pdf [file c4cy01757a1.pdf]

## Supporting Information for:

### In situ growth of carbon nanotubes/SiC nanowires 1D-1D heterostructures with enhanced photocatalytic H<sub>2</sub>-evolution activities under visible light irradiation

Xunfu Zhou, Xin Li,\* Qiongzhi Gao, Jielin Yuan, Jiuqing Wen, Yueping Fang,\* Wei Liu, Shengsen zhang, Yingju

Liu

† College of Science, South China Agricultural University, Guangzhou 510642, China

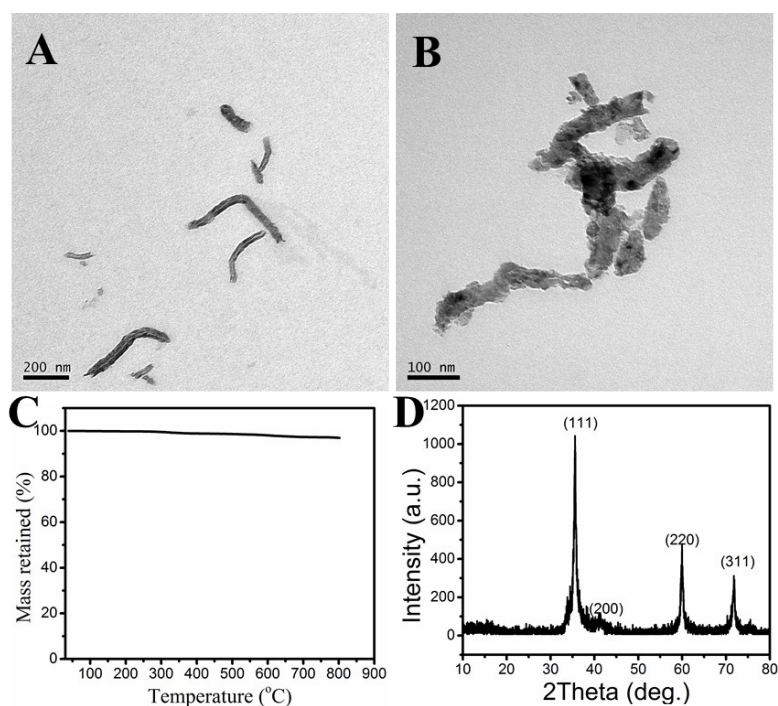

**Fig. S1.** TEM (A) of acid-treated CNTs; and TEM (B) images, TGA (C) and XRD pattern of the R-SiC.
